# Supplementary material for: AIMP3 inhibits cell growth and metastasis of lung adenocarcinoma through activating a miR‐96‐5p‐AIMP3‐p53 axis
Source: PubMed Central journal article supplement (PMC7957209; doi:10.1111/jcmm.16344), 2021-02-04

Supplementary Figure 3

**A**

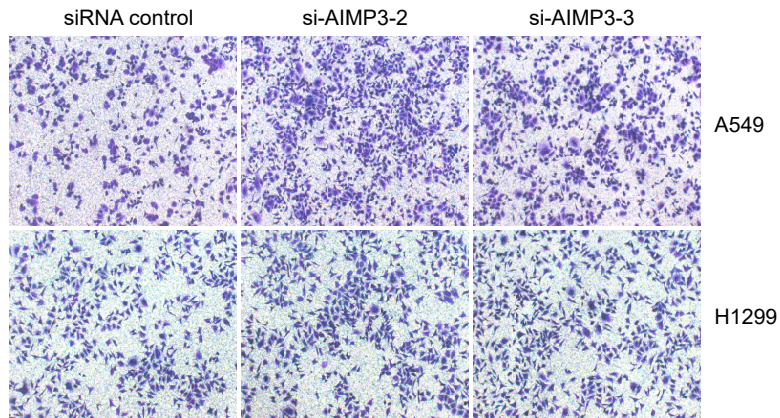

**B**

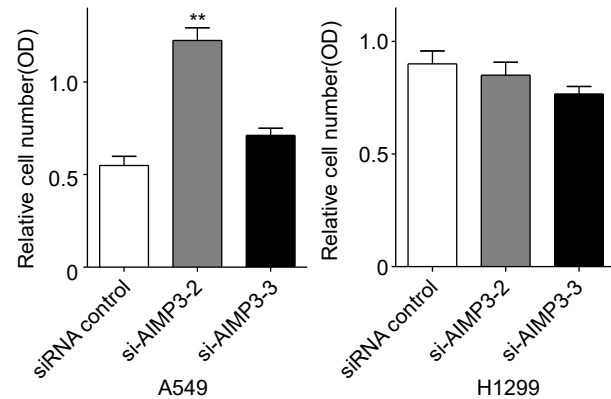

Supplement: JCMM-25-3019-s003.pdf [file JCMM-25-3019-s003.pdf]
